# Supplementary material for: Oil for health in sub-Saharan Africa: health systems in a 'resource curse' environment
Source: Springer Nature journal article supplement (doi:10.1186/1744-8603-4-10), 2008-01-01
Supplement: Additional file 1 [file 1744-8603-4-10-s1.doc]

**Table 2: Some key features about selected oil-producing countries**

|  | **Niger Delta Region (Nigeria)** | **Southern Chad** | **Angola** | **Southern Sudan** | Norway |
| --- | --- | --- | --- | --- | --- |
| Human development index (HDI) year 2005 | 0.564a | NA | 0.446b | NA | 0.968b |
| Life expectancy at birth | 43 years (UNDP estimate for 2006)a | NA | 41.7 years (2005)b | 42 years (2001)c | 79.8 years (2005)b |
| Under five mortality (per 1,000) | 103 (2003)a | NA | 260 (2003)d | 250 (2001)c | 4 (2000)e |
| % population living in extreme poverty | 70% (UNDP estimate)a; 54.4% (government estimate 2004) | NA | NA | >90% (2003)c | Generic poverty index not applicable |
| Nature of conflict and instability | Local, ongoing political violence | Currently stable in oil extraction area | Post-conflict, returnees. Separatist movement in the Cabinda enclave | Immediate post-conflict, unstable | Not applicable |
| Independence year | 1960 | 1960 | 1975 | 1956 | 1814 |
| Other relevant historical landmarks |  |  | end of civil war: April 2002 | Comprehensive Peace Agreement (CPA): 2005 |  |
| Year of beginning of oil production | 1958f | 2004g | 1956 h | 1999i | 1971 j |
| Oil exports dependence (% GDP) | 52% (2007)k | 33.4% (2004)l | 54% (2004)l | NA | 23.1% (2006)m |
| Exploitation sites | onshore and offshore | onshore | offshore | onshore | offshore |
| Stated revenue allocation to oil-producing host communities | 13%n | 5%o | Not applicable | 2%p | Not applicable |

NA: data for the considered indicator are not available at sub-national level.

Sources: aUNDP Nigeria [1]; bUNDP [2]; cUNICEF [3]; dWHO [4]; eUNICEF [5]; fAaron KK [6]; g-hWurthmann G [7]; iECOS [8]; jGovernment of Norway [9]; kWorld Bank [10]; lOECD [11]; mStatistics Norway [12]; nHuman Rights Watch Report [13]; oWorld Bank [14]; pUSAID [15]: figure taken from the example of the Ngok-Dinka chiefdoms in the Abiey territory.

**References**

1. UNDP Nigeria: **Niger Delta human development report**; 2006 [<http://www.ng.undp.org/reports/nigeria_hdr_report.pdf>]. Accessed 11 October 2008
2. UNDP: **Human Development Report 2007/2008.** [[http://hdr.undp.org](http://hdr.undp.org/)]. Accessed 11 October 2008
3. UNICEF: **Towards a baseline: best estimates of social indicators for Southern Sudan***.* New Sudan Centre for Statistics and Evaluation, in association with UNICEF. NSCSE series paper 1/2004. [<http://www.reliefweb.int/library/documents/2004/splm-sud-31may.pdf>]. Accessed 11 October 2008
4. WHO: *WHO Regional Offices Statistics* 2007 [<http://www.who.int/healthinfo/statistics/regions/en/index.html>] Accessed 11 October 2008. Geneva: World Health Organization.
5. UNICEF: **Infant and under five mortality** 2001 [<http://www.unicef.org/specialsession/about/sgreport-pdf/01_InfantAndUnder-FiveMortality_D7341Insert_English.pdf>]. Accessed 11 October 2008
6. Aaron KK: **Perspective: big oil, rural poverty, and environmental degradation in the Niger Delta region of Nigeria.** *J Agric Saf Health* 2005, **11(2):**127-134.
7. Wurthmann G: **Ways of using the African oil boom for sustainable development***.* Economic Research Working Paper No. 84 [<http://www.afdb.org/pls/portal/docs/PAGE/ADB_ADMIN_PG/DOCUMENTS/ECONOMICSANDRESEARCH/ERWP_84_0.PDF>] Accessed 11 October 2008. African Development Bank; March 2006.
8. ECOS (European Coalition on oil in Sudan): **Sudan’s oil industry: facts and analysis, April 2008.** [[http://www.ecosonline.org](http://www.ecosonline.org/)]. Accessed 11 October 2008
9. Government of Norway, Ministry of Petroleum and Energy: **Chapter 1: Norwegian oil history in brief.** In *Fact sheet: Norwegian petroleum activity*; 2004. [<http://www.regjeringen.no/en/dep/oed/Documents-and-publications/Reports/2004/Fact-Sheet-2004-Norwegian-Petroleum-Activity-.html?id=419441>]. Accessed 11 October 2008
10. World Bank: **Country brief: Nigeria**2007 [<http://web.worldbank.org/WBSITE/EXTERNAL/COUNTRIES/AFRICAEXT/NIGERIAEXTN/0,,menuPK:368906~pagePK:141132~piPK:141107~theSitePK:368896,00.html>]. Accessed 11 October 2008
11. OECD: **African Economic Outlook 2005/2006.** Country studies: Angola. [<http://www.oecd.org/dataoecd/37/35/36734978.pdf>] and Chad [<http://www.oecd.org/dataoecd/37/22/36735933.pdf>]. Accessed 11 October 2008
12. Statistics Norway: **External economy** 2006 [<http://www.ssb.no/english/subjects/09/ur_okonomi_en/>]. Accessed 11 October 2008
13. Human Rights Watch Report: **Chop Fine. The human rights impact of local government corruption and mismanagement in Rivers State, Nigeria.** 2007 (January), **Vol.** **19**, No. 2(A). [<http://hrw.org/reports/2007/nigeria0107/>]. Accessed 11 October 2008
14. World Bank: **A rekindling of hope in the oil producing region**. World Bank, Washington, D.C; 2007 [<http://web.worldbank.org/WBSITE/EXTERNAL/COUNTRIES/AFRICAEXT/>]. Accessed 23 December 2007
15. USAID: **Sudan: strategy statement 2006-08**; 2007. [<http://www.usaid.gov/locations/sub-saharan_africa/countries/sudan/docs/sudan_strategy.pdf>]. Accessed 11 October 2008
